# Supplementary material for: Xrn1/Pacman affects apoptosis and regulates expression of hid and reaper
Source: PubMed Central journal article supplement (PMC4434816; doi:10.1242/bio.201410199), 2015-04-02
Supplement: supp_bio.201410199_bio.201410199-s1.pdf [file supp_bio.201410199_bio.201410199-s1.pdf]

Supplementary Material

Joseph A. Waldron et al. doi: 10.1242/bio.201410199

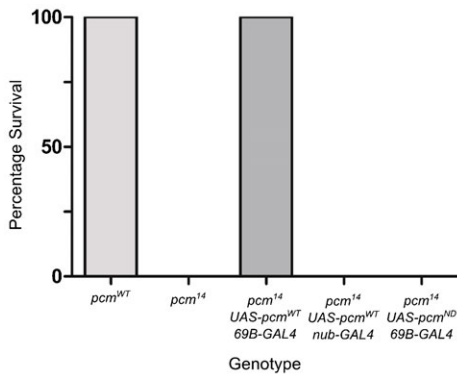

**Fig. S1. The *pcm<sup>14</sup>* mutation causes lethality during the pupal stage of development.** This lethality can be rescued by expressing a *UAS-pcm<sup>WT</sup>* construct with the *69B-GAL4* driver, but not with the *nub-GAL4* driver. Expression of *UAS-pcm<sup>ND</sup>* with *69B-GAL4* did not rescue lethality (n=60).

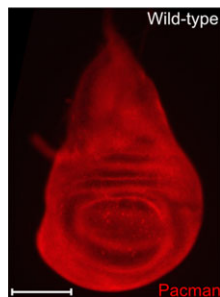

**Fig. S2. Pacman is expressed throughout the wing imaginal disc in wild type.** Scale bar represents 100  $\mu$ m.

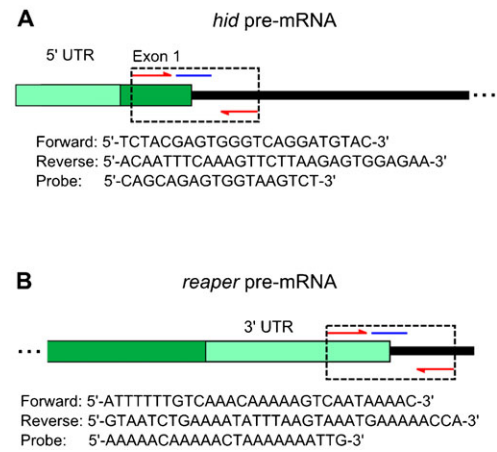

**Fig. S3. Diagrammatic representation of the custom TaqMan primer/probe sets used to measure the pre-mRNAs of (A) *hid* and (B) *reaper*.** Dashed box represents the 100 nt sequence submitted to Life Technologies' web-based Custom TaqMan Assay Design Tool. Actual sequences of primer/probes are listed.

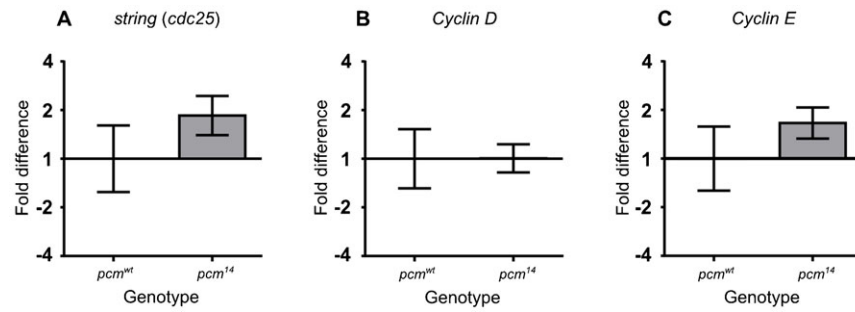

**Fig. S4.** The cell cycle genes *string (cdc25)*, *Cyclin D* and *Cyclin E* are not significantly differentially regulated in *pcm<sup>14</sup>* L3 wing imaginal discs compared to wild type.  $n=6$  for *pcm<sup>14</sup>* and  $n=7$  for wild type.  $p=0.083$  for *string*,  $p=0.984$  for *Cyclin D* and  $p=0.094$  for *Cyclin E*. Error bars represent standard error. *RpL32 (Rp49)* was used for normalisation.
